# Supplementary material for: Coupling Nanowire Quantum Dots to Optical Waveguides by Microsphere-Induced Photonic Nanojet
Source: MDPI journal article supplement (doi:10.3390/photonics11040343), 2024-04-09
Supplement: s1 [file s1]

Archive with 1 entries (1 files):
- photonics-2908946-supplementary.pdf
